# Supplementary material
Source: MDPI journal article supplement (https://www.mdpi.com/2071-1050/13/17/9534)
Supplement: s1 [file s1]

**Topic guide for interview related to urban Citizen Science projects implemented in lower and middle income country (LMIC) contexts:**

- Introduction of project, how data is being gathered and how it will be used
- Question topics
  - Project name
  - Country, contact info for organiser
  - Link to further info if avail.
  - What was the motivation for initiating the project? (e.g. awareness raising; new data for research; verification of data; informing decision-making; activism, etc.)
  - Which actors were involved (types) and what were their roles?
  - Basic project info (time period, # of participants, one-time vs repeated/continual)
  - What is the funding model for the work?
  - What are the impacts of the work? (in relation to E.g. related to awareness raising; new data for research; verification of data; informing decision-making; activism, etc.)
  - What would you consider the successes of the project?
  - What would you consider the challenges of the project?
  - Do you have any recommendations for future citizen science projects implemented in the LMIC country context?

Table S1. Resources describing urban citizen-generated data projects in low and middle income countries. Some projects are described in multiple resources and some resources described multiple projects.

| Project no. | Resource no. | Resource                                                                                                                                                                                                                                                                                                                           |
|-------------|--------------|------------------------------------------------------------------------------------------------------------------------------------------------------------------------------------------------------------------------------------------------------------------------------------------------------------------------------------|
| 1           | 1            | Citizen science participation in research in the environmental sciences: key factors related to projects' success and longevity<br>By: Fernandes Cunha, Davi Gasparini; de Resende, Juliana C.; de Falco, Patricia Bortoletto; et al.<br>ANAIS DA ACADEMIA BRASILEIRA DE CIÊNCIAS Volume: 89 Pages: 2229-2245 Published MAR 1 2017 |
| 1           | 2            | The contribution of volunteer-based monitoring data to the assessment of harmful phytoplankton blooms in Brazilian urban streams<br>By: Fernandes Cunha, Davi Gasparini; Casali, Simone Pereira; de Falco, Patricia Bortoletto; et al.<br>SCIENCE OF THE TOTAL ENVIRONMENT Volume: 584 Pages: 586-594 Published: APR 15 2017       |
| 1           | 3            | Combining citizen science and land use data to identify drivers of eutrophication in the Huangpu River system<br>By: Zhang, Yuchao; Ma, Ronghua; Hu, Minqi; et al.<br>SCIENCE OF THE TOTAL ENVIRONMENT Volume: 584 Pages: 651-664 Published: APR 15 2017                                                                           |
| 1           | 4            | Prioritising local action for water quality improvement using citizen science; a study across three major metropolitan areas of China<br>By: Thornhill, Ian; Ho, Jonathan G.; Zhang, Yuchao; et al.<br>SCIENCE OF THE TOTAL ENVIRONMENT Volume: 584 Pages: 1268-1281 Published: APR 15 2017                                        |
| 1           | 5            | Micro and Macroscale Drivers of Nutrient Concentrations in Urban Streams in South, Central and North America<br>By: Loiselle, Steven A.; Fernandes Cunha, Davi Gasparini; Shupe, Scott; et al.<br>PLOS ONE Volume: 11 Issue: 9 Article Number: e0162684 Published: SEP 23 2016                                                     |
| 1           | 6            | Quantification of phytoplankton bloom dynamics by citizen scientists in urban and peri-urban environments<br>By: Castilla, Eva Pintado; Fernandes Cunha, Davi Gasparini; Lee, Fred Wang Fat; et al.<br>ENVIRONMENTAL MONITORING AND ASSESSMENT Volume: 187 Issue: 11 Article Number: 690 Published: NOV 2015                       |
| 2           | 7            | Check-in behaviour and spatio-temporal vibrancy: An exploratory analysis in Shenzhen, China<br>By: Wu, Chao; Ye, Xinyue; Ren, Fu; et al.<br>CITIES Volume: 77 Pages: 104-116 Published: JUL 2018                                                                                                                                   |
| 3           | 8            | Participatory soundscape sensing<br>By: Li, Chunming; Liu, Yin; Haklay, Muki<br>LANDSCAPE AND URBAN PLANNING Volume: 173 Pages: 64-69 Published: MAY 2018                                                                                                                                                                          |
| 4           | 9            | Mining urban passengers' travel patterns from incomplete data with use cases<br>By: Weng, Xiaoxiong; Liu, Yongxin; Song, Houbing; et al.                                                                                                                                                                                           |

|                  |    |                                                                                                                                                                                                                                                                                                                 |
|------------------|----|-----------------------------------------------------------------------------------------------------------------------------------------------------------------------------------------------------------------------------------------------------------------------------------------------------------------|
|                  |    | COMPUTER NETWORKS Volume: 134 Pages: 116-126 Published: APR 7 2018                                                                                                                                                                                                                                              |
| 5                | 10 | Using Volunteered Geographic Information to measure name changes of artificial geographical features as a result of political changes: a Libya case study<br>By: Ahmouda, Ahmed; Hochmair, Hartwig H.<br>GEOJOURNAL Volume: 83 Issue: 2 Pages: 237-255 Published: APR 2018                                      |
| 6                | 11 | The potential of volunteered geographic information to investigate peri-urbanization in the conservation zone of Mexico City<br>By: Heider, Katharina; Lopez, Juan Miguel Rodriguez; Scheffran, Juergen<br>ENVIRONMENTAL MONITORING AND ASSESSMENT Volume: 190 Issue: 4 Article Number: 219 Published: APR 2018 |
| 6                | 12 | Frontiers of urbanization: Identifying and explaining urbanization hot spots in the south of MexicoCity using human and remote sensing<br>By: Rodriguez Lopez, Juan Miguel; Heider, Katharina; Scheffran, Juergen<br>APPLIED GEOGRAPHY Volume: 79 Pages: 1-10 Published: FEB 2017                               |
| 7                | 13 | Urban infrastructure safety system based on mobile crowdsensing<br>By: Zhao, Xuefeng; Wang, Niannian; Han, Ruicong; et al.<br>INTERNATIONAL JOURNAL OF DISASTER RISK REDUCTION Volume: 27 Pages: 427-438 Published: MAR 2018                                                                                    |
| 8                | 14 | Social Network Based Crowd Sensing for Intelligent Transportation and Climate Applications<br>By: Tse, Rita; Zhang, Lu Fan; Lei, Philip; et al.<br>MOBILE NETWORKS & APPLICATIONS Volume: 23 Issue: 1 Special Issue: SI Pages: 177-183 Published: FEB 2018                                                      |
| 9, 10,<br>11, 12 | 15 | Spatial data for slum upgrading: Volunteered Geographic Information and the role of citizen science<br>By: Hachmann, Samyra; Arsanjani, Jamal Jokar; Vaz, Eric<br>HABITAT INTERNATIONAL Volume: 72 Special Issue: SI Pages: 18-26 Published: FEB 2018                                                           |
| 9                | 16 | <a href="http://www.govtech.com/fs/Innovative-Urban-Apps-Feature-Crowdsourcing-Virtual-Reality.html">http://www.govtech.com/fs/Innovative-Urban-Apps-Feature-Crowdsourcing-Virtual-Reality.html</a>                                                                                                             |
| 13               | 17 | Flooding and inundation collaborative mapping - use of the Crowdmap/Ushahidi platform in the city of Sao Paulo, Brazil<br>By: Hirata, E.; Giannotti, M. A.; Larocca, A. P. C.; et al.<br>JOURNAL OF FLOOD RISK MANAGEMENT Volume: 11 Supplement: 1 Pages: S98-S109 Published: JAN 2018                          |
| 14               | 18 | Factors affecting presence of vervet monkey troops in a suburban matrix in KwaZulu-Natal, South Africa<br>By: Patterson, Lindsay; Kalle, Riddhika; Downs, Colleen<br>LANDSCAPE AND URBAN PLANNING Volume: 169 Pages: 220-228 Published: JAN 2018                                                                |
| 15               | 19 | Adaptive Sampling for Urban Air Quality through Participatory Sensing<br>By: Zeng, Yuanyuan; Xiang, Kai<br>SENSORS Volume: 17 Issue: 11 Article Number: 2531 Published: NOV 2017                                                                                                                                |
| 16               | 20 | Utilising volunteered geographic information to assess resident's flood evacuation shelters. Case study: Jakarta                                                                                                                                                                                                |

|    |    |                                                                                                                                                                                                                                                                                                                    |
|----|----|--------------------------------------------------------------------------------------------------------------------------------------------------------------------------------------------------------------------------------------------------------------------------------------------------------------------|
|    |    | By: Kusumo, A. N. L.; Reckien, D.; Verplanke, J.<br>APPLIED GEOGRAPHY Volume: 88 Pages: 174-185 Published: NOV 2017                                                                                                                                                                                                |
| 16 | 21 | <a href="https://webapps.itc.utwente.nl/librarywww/papers_2016/msc/upm/kusumo.pdf">https://webapps.itc.utwente.nl/librarywww/papers_2016/msc/upm/kusumo.pdf</a>                                                                                                                                                    |
| 17 | 22 | Smartphone-based crowdsourcing for position estimation of public transport vehicles<br>By: Mukheja, Pankaj; Kiran, Mukesh K.; Velaga, Nagendra R.; et al.<br>IET INTELLIGENT TRANSPORT SYSTEMS Volume: 11 Issue: 9 Pages: 588-595 Published: NOV 2017                                                              |
| 18 | 23 | Electric Vehicle Route Selection and Charging Navigation Strategy Based on Crowd Sensing<br>By: Yang, Hongming; Deng, Youjun; Qiu, Jing; et al.<br>IEEE TRANSACTIONS ON INDUSTRIAL INFORMATICS Volume: 13 Issue: 5 Pages: 2214-2226 Published: OCT 2017                                                            |
| 19 | 24 | Difference of urban development in China from the perspective of passenger transport around Spring Festival<br>By: Xu, Jun; Li, Aoyong; Li, Dong; et al.<br>APPLIED GEOGRAPHY Volume: 87 Pages: 85-96 Published: OCT 2017                                                                                          |
| 20 | 25 | Social Media: New Perspectives to Improve Remote Sensing for Emergency Response<br>By: Li, Jun; He, Zhi; Plaza, Javier; et al.<br>PROCEEDINGS OF THE IEEE Volume: 105 Issue: 10 Special Issue: SI Pages: 1900-1912 Published: OCT 2017                                                                             |
| 21 | 26 | A Novel Methodology to Label Urban Remote Sensing Images Based on Location-Based Social Media Photos<br>By: Chi, Mingmin; Sun, Zhongyi; Qin, Yiqing; et al.<br>PROCEEDINGS OF THE IEEE Volume: 105 Issue: 10 Special Issue: SI Pages: 1926-1936 Published: OCT 2017                                                |
| 22 | 27 | Automatic Rich Map Semantics Identification Through Smartphone-Based Crowd-Sensing<br>By: Aly, Heba; Basalamah, Anas; Youssef, Moustafa<br>IEEE TRANSACTIONS ON MOBILE COMPUTING Volume: 16 Issue: 10 Pages: 2712-2725 Published: OCT 1 2017                                                                       |
| 23 | 28 | The Combined Use of Remote Sensing and Social Sensing Data in Fine-Grained Urban Land Use Mapping: A Case Study in Beijing, China<br>By: Zhang, Yuan; Li, Qiangzi; Huang, Huiping; et al.<br>REMOTE SENSING Volume: 9 Issue: 9 Article Number: 865 Published: SEP 2017                                             |
| 24 | 29 | Event-Driven Distributed Information Resource-Focusing Service for Emergency Response in SmartCity with Cyber-Physical Infrastructures<br>By: Xiao, Changjiang; Chen, Nengcheng; Gong, Jianya; et al.<br>ISPRS INTERNATIONAL JOURNAL OF GEO-INFORMATION Volume: 6 Issue: 8 Article Number: 251 Published: AUG 2017 |
| 25 | 30 | Measuring fine-grained metro interchange time via smartphones<br>By: Gu, Weixi; Zhang, Kai; Zhou, Zimu; et al.<br>TRANSPORTATION RESEARCH PART C-EMERGING TECHNOLOGIES Volume: 81 Pages: 153-171 Published: AUG 2017                                                                                               |
| 26 | 31 | Exploring urban tourism crowding in Shanghai via crowdsourcing geospatial data                                                                                                                                                                                                                                     |

|    |    |                                                                                                                                                                                                                                                                                           |
|----|----|-------------------------------------------------------------------------------------------------------------------------------------------------------------------------------------------------------------------------------------------------------------------------------------------|
|    |    | By: Shi, Beiqi; Zhao, Jinlin; Chen, Po-Ju<br>CURRENT ISSUES IN TOURISM Volume: 20 Issue: 11 Special Issue: SI Pages: 1186-1209 Published: AUG 2017                                                                                                                                        |
| 27 | 32 | CANS: context-aware traffic estimation and navigation system<br>By: Ramazani, Azam; Vahdat-Nejad, Hamed<br>IET INTELLIGENT TRANSPORT SYSTEMS Volume: 11 Issue: 6 Pages: 326-333 Published: AUG 2017                                                                                       |
| 28 | 33 | Crisis information to support spatial planning in post disaster recovery<br>By: Mejri, Ouejdane; Menoni, Scira; Matias, Kyla; et al.<br>INTERNATIONAL JOURNAL OF DISASTER RISK REDUCTION Volume: 22 Pages: 46-61 Published: JUN 2017                                                      |
| 29 | 34 | Mapping fine-scale population distributions at the building level by integrating multisource geospatial big data<br>By: Yao, Yao; Liu, Xiaoping; Li, Xia; et al.<br>INTERNATIONAL JOURNAL OF GEOGRAPHICAL INFORMATION SCIENCE Volume: 31 Issue: 6 Pages: 1220-1244 Published: JUN 2017    |
| 30 | 35 | Generating Up-to-Date and Detailed Land Use and Land Cover Maps Using OpenStreetMap and GlobeLand30<br>By: Fonte, Cidalia Costa; Minghini, Marco; Patriarca, Joaquim; et al.<br>ISPRS INTERNATIONAL JOURNAL OF GEO-INFORMATION Volume: 6 Issue: 4 Article Number: 125 Published: APR 2017 |
| 31 | 36 | SenseCityVity: Mobile Crowdsourcing, Urban Awareness, and Collective Action in Mexico<br>By: Ruiz-Correa, Salvador; Santani, Darshan; Ramirez-Salazar, Beatriz; et al.<br>IEEE PERVASIVE COMPUTING Volume: 16 Issue: 2 Pages: 44-53 Published: APR-JUN 2017                               |
| 31 | 37 | <a href="http://publications.idiap.ch/downloads/papers/2016/Gatica-Perez_DIGITALPOLIS_2016.pdf">http://publications.idiap.ch/downloads/papers/2016/Gatica-Perez_DIGITALPOLIS_2016.pdf</a>                                                                                                 |
| 31 | 38 | <a href="https://www.springer.com/cda/content/document/cda_downloadaddocument/9783319705590-c2.pdf?SGWID=0-0-45-1627302-p181236163">https://www.springer.com/cda/content/document/cda_downloadaddocument/9783319705590-c2.pdf?SGWID=0-0-45-1627302-p181236163</a>                         |
| 32 | 39 | Building the Multi-Modal Storytelling of Urban Emergency Events Based on Crowdsensing of Social Media Analytics<br>By: Xu, Zheng; Liu, Yunhuai; Zhang, Hui; et al.<br>MOBILE NETWORKS & APPLICATIONS Volume: 22 Issue: 2 Pages: 218-227 Published: APR 2017                               |
| 32 | 40 | Building knowledge base of urban emergency events based on crowdsourcing of social media<br>By: Xu, Zheng; Zhang, Hui; Hu, Chuanping; et al.<br>CONCURRENCY AND COMPUTATION-PRACTICE & EXPERIENCE Volume: 28 Issue: 15 Pages: 4038-4052 Published: OCT 2016                               |
| 32 | 41 | Participatory sensing-based semantic and spatial analysis of urban emergency events using mobile social media<br>By: Xu, Zheng; Zhang, Hui; Sugumaran, Vijayan; et al.<br>EURASIP JOURNAL ON WIRELESS COMMUNICATIONS AND NETWORKING Article Number: 44 Published: FEB 9 2016              |
| 32 | 42 | Crowd Sensing of Urban Emergency Events based on Social Media Big Data<br>By: Xu, Zheng; Zhang, Hui; Liu, Yunhuai; et al.                                                                                                                                                                 |

|    |    |                                                                                                                                                                                                                                                                                                                                                                                                                                                                                                                                                                                                                                                               |
|----|----|---------------------------------------------------------------------------------------------------------------------------------------------------------------------------------------------------------------------------------------------------------------------------------------------------------------------------------------------------------------------------------------------------------------------------------------------------------------------------------------------------------------------------------------------------------------------------------------------------------------------------------------------------------------|
|    |    | <p>Conference: 13th IEEE International Conference on Trust Security and Privacy in Computing and Communications (TrustCom) Location: Beijing, PEOPLES R CHINA Date: SEP 24-26, 2014</p> <p>Sponsor(s): IEEE; IEEE Comp Soc; IEEE Tech Comm Scalable Comp; Tsinghua Univ; NSFC; Comp Sci Org; Huawei; Tsinghua Univ, Sch Software</p> <p>2014 IEEE 13TH INTERNATIONAL CONFERENCE ON TRUST, SECURITY AND PRIVACY IN COMPUTING AND COMMUNICATIONS (TRUSTCOM) Book Series: IEEE International Conference on Trust Security and Privacy in Computing and Communications Pages: 605-610 Published: 2014</p>                                                         |
| 33 | 43 | <p>"Internet plus " approach to mapping exposure and seismic vulnerability of buildings in a context of rapid socioeconomic growth: a case study in Tangshan, China</p> <p>By: Qi, Wenhua; Su, Guiwu; Sun, Lei; et al.</p> <p>NATURAL HAZARDS Volume: 86 Supplement: 1 Pages: 107-139 Published: MAR 2017</p>                                                                                                                                                                                                                                                                                                                                                 |
| 34 | 44 | <p>PMViewer: A Crowdsourcing Approach to Fine-Grained Urban PM2.5 Monitoring in China</p> <p>By: Zhang, ChengYi; Wang, Yazhe; Liu, Peng; et al.</p> <p>Conference: 14th IEEE International Conference on Mobile Ad Hoc and Sensor Systems (MASS) Location: Orlando, FL Date: OCT 22-25, 2017</p> <p>Sponsor(s): Natl Sci Fdn; IEEE Comp Soc, Tech Comm Simulat; IEEE Tech Comm Distributed Proc; Journal Sensor &amp; Actuator Networks</p> <p>2017 IEEE 14TH INTERNATIONAL CONFERENCE ON MOBILE AD HOC AND SENSOR SYSTEMS (MASS) Book Series: IEEE International Conference on Mobile Ad-hoc and Sensor Systems Pages: 323-327 Published: 2017</p>           |
| 35 | 45 | <p>RoadCrowd: An Approach to Road Traffic Forecasting at Junctions using Crowd-Sourcing and Bayesian Model</p> <p>By: Khan, Sazid Zaman; Rahuman, W. M. Abdul; Dey, Shaon; et al.</p> <p>Conference: 5th International Conference on Research and Innovation in Information Systems (ICRIIS) - Social Transformation through Data Science Location: Langkawi, MALAYSIA Date: JUL 16-17, 2017</p> <p>2017 5TH INTERNATIONAL CONFERENCE ON RESEARCH AND INNOVATION IN INFORMATION SYSTEMS (ICRIIS 2017): SOCIAL TRANSFORMATION THROUGH DATA SCIENCE Book Series: International Conference on Research and Innovation in Information Systems Published: 2017</p> |
| 36 | 46 | <p>An Agent Based Traffic Regulation System for the Roadside Air Quality Control</p> <p>By: El Fazziki, Abdelaziz; Benslimane, Djamel; Sadiq, Abderrahmane; et al.</p> <p>IEEE ACCESS Volume: 5 Pages: 13192-13201 Published: 2017</p>                                                                                                                                                                                                                                                                                                                                                                                                                        |
| 37 | 47 | <p>CrowdMap: Crowdsourcing based City Traffic Map Generation</p> <p>By: Verma, Rohit</p> <p>Conference: 9th International Conference on Communication Systems and Networks (COMSNETS) Location: Bangalore, INDIA Date: JAN 04-08, 2017</p>                                                                                                                                                                                                                                                                                                                                                                                                                    |

|    |    |                                                                                                                                                                                                                                                                                                                                                                                                                                                                                                                          |
|----|----|--------------------------------------------------------------------------------------------------------------------------------------------------------------------------------------------------------------------------------------------------------------------------------------------------------------------------------------------------------------------------------------------------------------------------------------------------------------------------------------------------------------------------|
|    |    | <p>Sponsor(s): Cisco Syst; Qualcomm; Microsoft; Tata Consultancy Serv; Google; Xerox; IBM Res; Robert Bosch GmbH; Adobe Syst; FIDO Alliance; IEEE</p> <p>2017 9TH INTERNATIONAL CONFERENCE ON COMMUNICATION SYSTEMS AND NETWORKS (COMSNETS) Book Series: International Conference on Communication Systems and Networks Pages: 582-583 Published: 2017</p>                                                                                                                                                               |
| 38 | 48 | <p>GreenPlanner: Planning Personalized Fuel-efficient Driving Routes using Multi-sourced Urban Data</p> <p>By: Ding, Yan; Chen, Chao; Zhang, Shu; et al.</p> <p>Conference: IEEE International Conference on Pervasive Computing and Communications (PerCom) Location: HI Date: MAR 13-17, 2017</p> <p>Sponsor(s): IEEE</p> <p>2017 IEEE INTERNATIONAL CONFERENCE ON PERVASIVE COMPUTING AND COMMUNICATIONS (PERCOM) Book Series: International Conference on Pervasive Computing and Communications Published: 2017</p> |
| 39 | 49 | <p>Monitoring the built-up environment of Shanghai on the street-block level using SAR and volunteered geographic information</p> <p>By: Jendryke, Michael; McClure, Stephen C.; Balz, Timo; et al.</p> <p>INTERNATIONAL JOURNAL OF DIGITAL EARTH Volume: 10 Issue: 7 Pages: 675-686 Published: 2017</p>                                                                                                                                                                                                                 |
| 40 | 50 | <p>Incentive theory for a participatory crowdsourcing project in a developing country</p> <p>By: Bosha, Elizabeth; Cilliers, Liezel; Flowerday, Stephen</p> <p>SOUTH AFRICAN JOURNAL OF INFORMATION MANAGEMENT Volume: 19 Issue: 1 Article Number: a739 Published: 2017</p>                                                                                                                                                                                                                                              |
| 40 | 51 | <p>Information Security in a Public Safety, Participatory Crowdsourcing Smart City Project</p> <p>By: Cilliers, Liezel; Flowerday, Stephen</p> <p>Conference: World Congress on Internet Security (WorldCIS) Location: London, UNITED KINGDOM Date: DEC 08-10, 2014</p> <p>2014 WORLD CONGRESS ON INTERNET SECURITY (WORLDCIS) Book Series: World Congress on Internet Security Pages: 36-41 Published: 2014</p>                                                                                                         |
| 40 | 52 | <p>Using Participatory Crowdsourcing in South Africa to Create a Safer Living Environment</p> <p>By: Bhana, Bhavoor; Flowerday, Stephen; Satt, Aharon</p> <p>INTERNATIONAL JOURNAL OF DISTRIBUTED SENSOR NETWORKS Article Number: 907196 Published: 2013</p>                                                                                                                                                                                                                                                             |
| 41 | 53 | <p>Forecasting Public Transit Use by Crowdsensing and Semantic Trajectory Mining: Case Studies</p> <p>By: Zhang, Ningyu; Chen, Huajun; Chen, Xi; et al.</p> <p>ISPRS INTERNATIONAL JOURNAL OF GEO-INFORMATION Volume: 5 Issue: 10 Article Number: 180 Published: OCT 2016</p>                                                                                                                                                                                                                                            |
| 42 | 54 | <p>Crowdsourced data for flood hydrology: Feedback from recent citizen science projects in Argentina, France and New Zealand</p> <p>By: Le Coz, Jerome; Patalano, Antoine; Collins, Daniel; et al.</p>                                                                                                                                                                                                                                                                                                                   |

|    |    |                                                                                                                                                                                                                                                                                                                                                                                                                                                                                                                                                                                                                                       |
|----|----|---------------------------------------------------------------------------------------------------------------------------------------------------------------------------------------------------------------------------------------------------------------------------------------------------------------------------------------------------------------------------------------------------------------------------------------------------------------------------------------------------------------------------------------------------------------------------------------------------------------------------------------|
|    |    | JOURNAL OF HYDROLOGY Volume: 541 Pages: 766-777 Part: B Published: OCT 2016                                                                                                                                                                                                                                                                                                                                                                                                                                                                                                                                                           |
| 43 | 55 | Where do networks really work? The effects of the Shenzhen greenway network on supporting physical activities<br>By: Liu, Kun; Siu, Kin Wai Michael; Gong, Xi Yong; et al.<br>LANDSCAPE AND URBAN PLANNING Volume: 152 Pages: 49-58 Published: AUG 2016                                                                                                                                                                                                                                                                                                                                                                               |
| 44 | 56 | Urban function connectivity: Characterisation of functional urban streets with social media check-in data<br>By: Shen, Yao; Karimi, Kayvan<br>CITIES Volume: 55 Pages: 9-21 Published: JUN 2016                                                                                                                                                                                                                                                                                                                                                                                                                                       |
| 45 | 57 | Automated identification and characterization of parcels with OpenStreetMap and points of interest<br>By: Liu, Xingjian; Long, Ying<br>ENVIRONMENT AND PLANNING B-PLANNING & DESIGN Volume: 43 Issue: 2 Pages: 341-360 Published: MAR 2016                                                                                                                                                                                                                                                                                                                                                                                            |
| 46 | 58 | mu-shapes: Delineating urban neighborhoods using volunteered geographic information<br>By: Aadland, Matt; Farah, Christopher; Magee, Kevin<br>JOURNAL OF SPATIAL INFORMATION SCIENCE Issue: 12 Pages: 29-43 Published: 2016                                                                                                                                                                                                                                                                                                                                                                                                           |
| 47 | 59 | AN INTELLIGENT ROAD TRAFFIC MANAGEMENT SYSTEM USING NVIDIA GPU<br>By: Alam, Tahmid Tanzi; Chowdhury, Ahmad Naquib; Rahman, Mohammad Zahidur<br>Conference: 19th International Conference on Computer and Information Technology (ICCIT) Location: Dhaka, BANGLADESH<br>Date: DEC 18-20, 2016<br>Sponsor(s): IEEE Bangladesh Sect; Inst Elect & Elect Engineers; N S Univ<br>PROCEEDINGS OF THE 2016 19TH INTERNATIONAL CONFERENCE ON COMPUTER AND INFORMATION TECHNOLOGY (ICCIT)<br>Book Series: International Conference on Computer and Information Technology Pages: 419-424 Published: 2016                                       |
| 48 | 60 | iMap: A Crowdsensing Based System for Outdoor Radio Signal Strength Map<br>By: Fan, Xiaochen; Yang, Panlong; Xiang, Chaocan; et al.<br>Conference: 15th IEEE Int Conf on Trust, Security and Privacy in Comp and Commun / 10th IEEE Int Conf on Big Data Science and Engineering / 14th IEEE Int Symposium on Parallel and Distributed Proc with Applicat (IEEE Trustcom/BigDataSE/ISPA)<br>Location: Tianjin, PEOPLES R CHINA Date: AUG 23-26, 2016<br>Sponsor(s): IEEE; IEEE Comp Soc; IEEE Tech Comm Scalable Comp<br>2016 IEEE TRUSTCOM/BIGDATASE/ISPA Book Series: IEEE Trustcom BigDataSE ISPA Pages: 1442-1447 Published: 2016 |
| 49 | 61 | AirSense: Opportunistic Crowd-Sensing based Air Quality monitoring System for Smart City<br>By: Dutta, Joy; Gazi, Firoj; Roy, Sarbani; et al.<br>Conference: 15th IEEE Sensors Conference Location: Orlando, FL Date: OCT 30-NOV 03, 2016<br>Sponsor(s): IEEE; IEEE Sensors Council<br>2016 IEEE SENSORS Book Series: IEEE Sensors Published: 2016                                                                                                                                                                                                                                                                                    |
| 50 | 62 | PublicSense: A Crowd Sensing Platform for Public Facility Management in Smart Cities                                                                                                                                                                                                                                                                                                                                                                                                                                                                                                                                                  |



|    |    |                                                                                                                                                                                                                                                                                                                                                                                                                                                                                                                                                                                                                                                                                                                                                                                                                                                                                                                                                                                                                                                                                                                                                                                                                |
|----|----|----------------------------------------------------------------------------------------------------------------------------------------------------------------------------------------------------------------------------------------------------------------------------------------------------------------------------------------------------------------------------------------------------------------------------------------------------------------------------------------------------------------------------------------------------------------------------------------------------------------------------------------------------------------------------------------------------------------------------------------------------------------------------------------------------------------------------------------------------------------------------------------------------------------------------------------------------------------------------------------------------------------------------------------------------------------------------------------------------------------------------------------------------------------------------------------------------------------|
|    |    | <p>By: Wang, Zi; Guo, Bin; Yu, Zhiwen; et al.</p> <p>Conference: Conference on UIC/ATC/ScalCom/CBDCom/IoP/SmartWorld Location: Toulouse, FRANCE Date: JUL 18-21, 2016</p> <p>Sponsor(s): IEEE; IEEE Comp Soc; IEEE Tech Comm Scalable Comp; NVIDIA Corp; Berger Levrault; Univ Toulouse, LAAS CNRS; CNRS; MARIE TOULOUSE</p> <p>2016 INT IEEE CONFERENCES ON UBIQUITOUS INTELLIGENCE &amp; COMPUTING, ADVANCED &amp; TRUSTED COMPUTING, SCALABLE COMPUTING AND COMMUNICATIONS, CLOUD AND BIG DATA COMPUTING, INTERNET OF PEOPLE, AND SMART WORLD CONGRESS (UIC/ATC/SCALCOM/CBDCom/IOP/SMARTWORLD) Pages: 114-120 Published: 2016</p>                                                                                                                                                                                                                                                                                                                                                                                                                                                                                                                                                                           |
| 50 | 63 | <p>PublicSense: Refined Urban Sensing and Public Facility Management with Crowdsourced Data</p> <p>By: Zhang, Jiafan; Guo, Bin; Chen, Huihui; et al.</p> <p>Conference: 12th IEEE Int Conf Ubiquitous Intelligence &amp; Comp/12th IEEE Int Conf Autonom &amp; Trusted Comp/15th IEEE Int Conf Scalable Comp &amp; Commun &amp; Associated Workshops/IEEE Int Conf Cloud &amp; Big Data Comp/IEEE Int Conf Internet People Location: Beijing, PEOPLES R CHINA Date: AUG 10-14, 2015</p> <p>Sponsor(s): Inst Elect &amp; Elect Eng; IEEE Comp Soc; NSFC; IEEE Tech Comm Scalable Comp; Beijing Municipal Sci &amp; Technol Commiss; Zhejiang Univ; Tsinghua Univ; China Univ Petroleum; China Univ Geosciences; Shanghai Univ; Peking Univ; Beijing Union Univ; Tsinghua Sci &amp; Technol; Sci China Press; NE Univ; Univ Sci &amp; Technol Beijing; Cybermat &amp; Brain Informat S&amp;T Int Cooperat Base</p> <p>IEEE 12TH INT CONF UBIQUITOUS INTELLIGENCE &amp; COMP/IEEE 12TH INT CONF ADV &amp; TRUSTED COMP/IEEE 15TH INT CONF SCALABLE COMP &amp; COMMUN/IEEE INT CONF CLOUD &amp; BIG DATA COMP/IEEE INT CONF INTERNET PEOPLE AND ASSOCIATED SYMPOSIA/WORKSHOPS Pages: 1407-1412 Published: 2015</p> |
| 51 | 64 | <p>CRATER: A Crowd Sensing Application to Estimate Road Conditions</p> <p>By: Kalim, Faria; Jeong, Jaehoon (Paul); Ilyas, Muhammad U.</p> <p>IEEE ACCESS Volume: 4 Pages: 8317-8326 Published: 2016</p>                                                                                                                                                                                                                                                                                                                                                                                                                                                                                                                                                                                                                                                                                                                                                                                                                                                                                                                                                                                                        |
| 52 | 65 | <p>Land Use Classification in Construction Areas Based on Volunteered Geographic Information</p> <p>By: Chen, Chenru; Du, Zhenbo; Zhu, Dehai; et al.</p> <p>Conference: 5th International Conference on Agro-Geoinformatics (Agro-Geoinformatics) Location: Inst Agr Resources &amp; Regional Planning, Chinese Acad Agr Sci, Tianjin, PEOPLES R CHINA Date: JUL 18-20, 2016</p> <p>Sponsor(s): Tianjin Polytechn Univ; George Mason Univ, Ctr Spatial Informat Sci &amp; Syst; CSISS Fdn Inc; Open Geospatial Consortium; Turkish Minist Agr; TARBIL Agr Informat Appl Res Ctr; Istanbul Tech Univ; Chinese Acad Agr Sci; Chinese Soc Agr Resources &amp; Regional Planning; Chinese Assoc Agr Sci Soc; Wuhan Univ; IEEE Geoscience &amp; Remote Sensing Soc; State Adm Foreign Experts Affairs China; Minist Agr; Natl Nat Sci Fdn China</p> <p>2016 FIFTH INTERNATIONAL CONFERENCE ON AGRO-GEOINFORMATICS (AGRO-GEOINFORMATICS) Book Series: International Conference on Agro-Geoinformatics Pages: 32-35 Published: 2016</p>                                                                                                                                                                               |
| 53 | 66 | <p>Flooded Streets - A Crowdsourced Sensing System for Disaster Response: A Case Study</p>                                                                                                                                                                                                                                                                                                                                                                                                                                                                                                                                                                                                                                                                                                                                                                                                                                                                                                                                                                                                                                                                                                                     |

|    |    |                                                                                                                                                                                                                                                                                                                                                                                                                                                                                                                                                                                                                                                                                                   |
|----|----|---------------------------------------------------------------------------------------------------------------------------------------------------------------------------------------------------------------------------------------------------------------------------------------------------------------------------------------------------------------------------------------------------------------------------------------------------------------------------------------------------------------------------------------------------------------------------------------------------------------------------------------------------------------------------------------------------|
|    |    | <p>By: Naik, Nitin</p> <p>Conference: 2nd Annual IEEE International Symposium on Systems Engineering (ISSE) Location: Edinburgh, SCOTLAND Date: OCT 03-05, 2016</p> <p>Sponsor(s): IEEE; IEEE Syst Council</p> <p>2016 IEEE INTERNATIONAL SYMPOSIUM ON SYSTEMS ENGINEERING (ISSE) Pages: 429-431 Published: 2016</p>                                                                                                                                                                                                                                                                                                                                                                              |
| 54 | 67 | <p>Riding Quality Evaluation through Mobile Crowd Sensing</p> <p>By: Tan, Senyuan; Wang, Xiaoliang; Maier, Guido; et al.</p> <p>Conference: IEEE International Conference on Pervasive Computing and Communication Workshops (PerCom Workshops)</p> <p>Location: Sydney, AUSTRALIA Date: MAR 14-19, 2016</p> <p>Sponsor(s): IEEE; IEEE Comp Soc; Univ Texas Arlington; Natl Sci Fdn; Data61 CSIRO Australia; Rochester Inst Technol; Univ Queensland; Elseviers Pervas &amp; Mobile Comp Journal</p> <p>2016 IEEE INTERNATIONAL CONFERENCE ON PERVASIVE COMPUTING AND COMMUNICATIONS (PERCOM) Book Series: International Conference on Pervasive Computing and Communications Published: 2016</p> |
| 55 | 68 | <p>A Digital Platform to Support Citizen-Government Interactions from Volunteered Geographic Information and Crowdsourcing in Mexico City</p> <p>By: Tapia-McClung, Rodrigo</p> <p>Conference: 16th International Conference on Comp</p>                                                                                                                                                                                                                                                                                                                                                                                                                                                          |
| 56 | 69 | <p>A Mobile Information System Based on Crowd-Sensed and Official Crime Data for Finding Safe Routes: A Case Study of Mexico City</p> <p>By: Mata, Felix; Torres-Ruiz, Miguel; Guzman, Giovanni; et al.</p> <p>MOBILE INFORMATION SYSTEMS Pages: 1-11 Article Number: 8068209 Published: 2016</p>                                                                                                                                                                                                                                                                                                                                                                                                 |
| 57 | 70 | <p>Emotional Landmarks in Cities The Emotional Life of Cities as Expressed on Social Networks</p> <p>By: Iaconesi, Salvatore</p> <p>SOCIOLOGICA-ITALIAN JOURNAL OF SOCIOLOGY ON LINE Issue: 3 Published: 2015</p>                                                                                                                                                                                                                                                                                                                                                                                                                                                                                 |
| 58 | 71 | <p>Developing a community-based worldwide urban morphology and materials database (WUDAPT) using remote sensing and crowdsourcing for improved urban climate modelling</p> <p>By: See, Linda; Perger, Christoph; Duerauer, Martina; et al.</p> <p>Conference: Joint Urban Remote Sensing Event Location: Lausanne, SWITZERLAND Date: MAR 30-APR 01, 2015</p> <p>Sponsor(s): Ecole Polytechnique Fed Lausanne; Univ Lausanne Inst Geog Durabilite; Univ Zurich</p> <p>2015 JOINT URBAN REMOTE SENSING EVENT (JURSE) Published: 2015</p>                                                                                                                                                            |
| 59 | 72 | <p>Toward Enabling Convenient Urban Transit through Mobile Crowdsensing</p> <p>By: Bajaj, Garvita; Bouloukakis, Georgios; Pathak, Animesh; et al.</p>                                                                                                                                                                                                                                                                                                                                                                                                                                                                                                                                             |

|    |    |                                                                                                                                                                                                                                                                                                                                                                                                                                                                                                                                                             |
|----|----|-------------------------------------------------------------------------------------------------------------------------------------------------------------------------------------------------------------------------------------------------------------------------------------------------------------------------------------------------------------------------------------------------------------------------------------------------------------------------------------------------------------------------------------------------------------|
|    |    | Conference: 18th IEEE International Conference on Intelligent Transportation Systems Location: SPAIN Date: SEP 15-18, 2015<br>Sponsor(s): IEEE; Int Transportat Syst Soc; CVCEI; Univ Las Palmas Gran Canaria; Ayuntamiento Las Palmas Gran Canaria; LPA; IEEE Comp Soc; Univ Las Palmas Gran Canaria, Inst Univ Ciencias Tecnologias Ciberneticas<br>2015 IEEE 18TH INTERNATIONAL CONFERENCE ON INTELLIGENT TRANSPORTATION SYSTEMS Book Series: IEEE<br>International Conference on Intelligent Transportation Systems-ITSC Pages: 290-295 Published: 2015 |
| 60 | 73 | Good neighbours: distribution of black-tufted marmoset ( <i>Callithrix penicillata</i> ) in an urban environment<br>By: Teixeira, Bruno; Hirsch, Andre; Goulart, Vinicius D. L. R.; et al.<br>WILDLIFE RESEARCH Volume: 42 Issue: 7 Pages: 579-589 Published: 2015                                                                                                                                                                                                                                                                                          |
| 61 | 74 | Crowdsourcing information for knowledge-based design of routes for unscheduled public transport trips<br>By: Cairo, Osvaldo; Salcedo, Jose Sendra; Octavio Gutierrez-Garcia, J.<br>JOURNAL OF KNOWLEDGE MANAGEMENT Volume: 19 Issue: 3 Pages: 626-640 Published: 2015                                                                                                                                                                                                                                                                                       |
| 62 | 75 | Crowdsourcing for Geodesign: Opportunities and Challenges for Stakeholder Input in Urban Planning<br>By: Borges, Junia; Jankowski, Piotr; Davis, Clodoveu A., Jr.<br>Conference: 27th International Cartographic Conference (ICC) Location: Rio de Janeiro, BRAZIL Date: AUG 23-28, 2015<br>CARTOGRAPHY - MAPS CONNECTING THE WORLD Book Series: Lecture Notes in Geoinformation and Cartography Pages: 361-373 Published: 2015                                                                                                                             |
| 63 | 76 | Taxonomy of Citizen Sensing for Intelligent Urban Infrastructures<br>By: Gallo, Diego S.; Cardonha, Carlos; Avegliano, Priscilla; et al.<br>IEEE SENSORS JOURNAL Volume: 14 Issue: 12 Pages: 4154-4164 Published: DEC 2014                                                                                                                                                                                                                                                                                                                                  |
| 63 | 77 | <a href="http://thecityfix.com/blog/rota-acessivel-app-accessibility-crowdsourcing-priscila-kichler-pacheco/">http://thecityfix.com/blog/rota-acessivel-app-accessibility-crowdsourcing-priscila-kichler-pacheco/</a>                                                                                                                                                                                                                                                                                                                                       |
| 64 | 78 | Crowdsourcing urban air temperatures from smartphone battery temperatures<br>By: Overeem, A.; Robinson, J. C. R.; Leijnse, H.; et al.<br>GEOPHYSICAL RESEARCH LETTERS Volume: 40 Issue: 15 Pages: 4081-4085 Published: AUG 16 2013                                                                                                                                                                                                                                                                                                                          |
| 65 | 79 | Citizen Science Provides Valuable Data for Monitoring Global Night Sky Luminance<br>By: Kyba, Christopher C. M.; Wagner, Janna M.; Kuechly, Helga U.; et al.<br>SCIENTIFIC REPORTS Volume: 3 Article Number: 1835 Published: MAY 16 2013                                                                                                                                                                                                                                                                                                                    |
| 66 | 80 | Human Sensors: Case-study of Open-ended Community Sensing in Developing Regions<br>By: Yadav, Kuldeep; Chakraborty, Dipanjan; Soubam, Sonia; et al.<br>Conference: IEEE International Conference on Pervasive Computing and Communications Workshops (PERCOM Workshops)<br>Location: San Diego, CA Date: MAR 18-22, 2013<br>Sponsor(s): IEEE; IBM Res                                                                                                                                                                                                       |

|    |    |                                                                                                                                                                                                                                                                                                                                                                                                                                                                                                                                                                                                                                                                                                                                                                                                                                                                                                                                                  |
|----|----|--------------------------------------------------------------------------------------------------------------------------------------------------------------------------------------------------------------------------------------------------------------------------------------------------------------------------------------------------------------------------------------------------------------------------------------------------------------------------------------------------------------------------------------------------------------------------------------------------------------------------------------------------------------------------------------------------------------------------------------------------------------------------------------------------------------------------------------------------------------------------------------------------------------------------------------------------|
|    |    | 2013 IEEE INTERNATIONAL CONFERENCE ON PERVASIVE COMPUTING AND COMMUNICATIONS WORKSHOPS (PERCOM WORKSHOPS) Book Series: International Conference on Pervasive Computing and Communications Pages: 389-392 Published: 2013                                                                                                                                                                                                                                                                                                                                                                                                                                                                                                                                                                                                                                                                                                                         |
| 67 | 81 | Airify - A mobile solution for monitoring air quality in urban areas<br>By: Gruicin, Iasmina; Popa, Mircea<br>Conference: 25th Telecommunication Forum (TELFOR) Location: Belgrade, SERBIA Date: NOV 21-22, 2017<br>Sponsor(s): Telecommunicat Soc; Univ Belgrade, Sch Elect Engn; IEEE Commun Soc Serbia & Montenegro Chapter; IEEE; IEEE Reg 8; mts; Telekom Srbija; VLATACOM d o o; Minist Trade Turism & Telecommunicat; IEEE Serbia & Montenegro COM Chapter; ERICSSON; IRITEL a d BEOGRAD; Kontriola letenja Srbije i Crne Gore SMATSA; MAKSNET Telekomunikacije; Minist Educ Sci & Technolog Dev; Public PTT Enterprise SRBIJA; Republ Agcy Elect Commun Serbia; ROAMING Networks; TERI Engn; VIP Mobile; CISCO; CRONY; CLOUD WORLDWIDE SERV; IEEE Serbia & Montenegro Sect; KAPSCH; Serbian Natl Register Internet Domain Names; ROHDE & SCHWARZ; UBconnect<br>2017 25TH TELECOMMUNICATION FORUM (TELFOR) Pages: 705-708 Published: 2017 |
| 68 | 82 | Detecting the transportation mode for context-aware systems using smartphones<br>By: Quintella, Carlos Alvaro de M. S.; Andrade, Leila C. V.; Campos, Carlos Alberto V.<br>Conference: 19th IEEE International Conference on Intelligent Transportation Systems (ITSC) Location: Rio de Janeiro, BRAZIL Date: NOV 01-04, 2016<br>Sponsor(s): IEEE<br>2016 IEEE 19TH INTERNATIONAL CONFERENCE ON INTELLIGENT TRANSPORTATION SYSTEMS (ITSC) Pages: 2261-2266 Published: 2016                                                                                                                                                                                                                                                                                                                                                                                                                                                                       |
| 69 | 83 | Revealing the City That We Cannot See<br>By: Silva, Thiago H.; De Melo, Pedro O. S. Vaz; Almeida, Jussara M.; et al.<br>ACM TRANSACTIONS ON INTERNET TECHNOLOGY Volume: 14 Issue: 4 Special Issue: SI Article Number: 26 Published: DEC 2014                                                                                                                                                                                                                                                                                                                                                                                                                                                                                                                                                                                                                                                                                                     |
| 69 | 84 | LARGE-SCALE STUDY OF CITY DYNAMICS AND URBAN SOCIAL BEHAVIOR USING PARTICIPATORY SENSING<br>By: Silva, Thiago H.; Vaz de Melo, Pedro O. S.; Almeida, Jussara M.; et al.<br>IEEE WIRELESS COMMUNICATIONS Volume: 21 Issue: 1 Pages: 42-51 Published: FEB 2014                                                                                                                                                                                                                                                                                                                                                                                                                                                                                                                                                                                                                                                                                     |
| 69 | 85 | Challenges and opportunities on the large scale study of city dynamics using participatory sensing<br>By: Silva, Thiago H.; Vaz de Melo, Pedro O. S.; Almeida, Jussara M.; et al.<br>Conference: 18th IEEE Symposium on Computers and Communications (ISCC) Location: Univ Split, Split, CROATIA Date: JUL 07-10, 2013<br>Sponsor(s): IEEE; IEEE Comp Soc; IEEE Commun Soc; IEEE Hrvatska Sekcija; Fdn Acad                                                                                                                                                                                                                                                                                                                                                                                                                                                                                                                                      |

|               |     |                                                                                                                                                                                                                                                                                                                                                   |
|---------------|-----|---------------------------------------------------------------------------------------------------------------------------------------------------------------------------------------------------------------------------------------------------------------------------------------------------------------------------------------------------|
|               |     | 2013 IEEE SYMPOSIUM ON COMPUTERS AND COMMUNICATIONS (ISCC) Book Series: IEEE Symposium on Computers and Communications ISCC Published: 2013                                                                                                                                                                                                       |
| 69            | 86  | <a href="http://dainf.ct.utfpr.edu.br/~thiago/papers/silva_wirelessMag14.pdf">http://dainf.ct.utfpr.edu.br/~thiago/papers/silva_wirelessMag14.pdf</a>                                                                                                                                                                                             |
| 69            | 87  | <a href="http://www.ubicomp.org/ubicomp2013/adjunct/adjunct/p1347.pdf">http://www.ubicomp.org/ubicomp2013/adjunct/adjunct/p1347.pdf</a>                                                                                                                                                                                                           |
| 70            | 88  | Towards a societal scale environmental sensing network with public participation<br>By: Li, Chunming; Wei, Dong; Vause, Jonathan; et al.<br>INTERNATIONAL JOURNAL OF SUSTAINABLE DEVELOPMENT AND WORLD ECOLOGY Volume: 20 Issue: 3 Special Issue: SI<br>Pages: 261-266 Published: JUN 1 2013                                                      |
| 71, 72,<br>73 | 89  | Transformations of urban studies and planning in the big/open data era: a review<br>By: Long, Ying; Liu, Lun<br>INTERNATIONAL JOURNAL OF IMAGE AND DATA FUSION Volume: 7 Issue: 4 Pages: 295-308 Published: 2016                                                                                                                                  |
| 74            | 90  | <a href="http://blogs.discovermagazine.com/citizen-science-salon/2018/04/13/citizen-science-in-the-city-2/#.WzSfndVKhhE">http://blogs.discovermagazine.com/citizen-science-salon/2018/04/13/citizen-science-in-the-city-2/#.WzSfndVKhhE</a>                                                                                                       |
| 75            | 91  | <a href="http://theconversation.com/citizen-science-how-ordinary-people-can-guard-cape-towns-biodiversity-87373">http://theconversation.com/citizen-science-how-ordinary-people-can-guard-cape-towns-biodiversity-87373</a>                                                                                                                       |
| 76            | 92  | <a href="https://citiesipcc.org/wp-content/uploads/2018/04/Head.pdf">https://citiesipcc.org/wp-content/uploads/2018/04/Head.pdf</a>                                                                                                                                                                                                               |
| 77            | 93  | <a href="https://scistarter.org/urban-slender-loris-project">https://scistarter.org/urban-slender-loris-project</a>                                                                                                                                                                                                                               |
| 78            | 94  | <a href="https://smartcitizen.me/">https://smartcitizen.me/</a>                                                                                                                                                                                                                                                                                   |
| 79            | 95  | <a href="https://emammal.si.edu/museums-connect-india">https://emammal.si.edu/museums-connect-india</a>                                                                                                                                                                                                                                           |
| 80            | 96  | <a href="https://oceanconference.un.org/commitments/?id=19954">https://oceanconference.un.org/commitments/?id=19954</a>                                                                                                                                                                                                                           |
| 81            | 97  | <a href="https://www.wild.org/blog/boulder-nature-challenge/">https://www.wild.org/blog/boulder-nature-challenge/</a>                                                                                                                                                                                                                             |
| 82            | 98  | <a href="https://publiclab.org/">https://publiclab.org/</a>                                                                                                                                                                                                                                                                                       |
| 83            | 99  | <a href="https://www.sciencedirect.com/science/article/pii/S0035920305002774">https://www.sciencedirect.com/science/article/pii/S0035920305002774</a>                                                                                                                                                                                             |
| 84            | 100 | <a href="http://citeseerx.ist.psu.edu/viewdoc/download?doi=10.1.1.1007.3912&amp;rep=rep1&amp;type=pdf">http://citeseerx.ist.psu.edu/viewdoc/download?doi=10.1.1.1007.3912&amp;rep=rep1&amp;type=pdf</a>                                                                                                                                           |
| 85            | 101 | <a href="http://egap.org/content/citizen-monitoring-urban-waterways-jiangsu-china">http://egap.org/content/citizen-monitoring-urban-waterways-jiangsu-china</a>                                                                                                                                                                                   |
| 86            | 102 | <a href="http://2013corporateresponsibilityreport.kinross.com/empowering-communities/case-study-community-monitoring-program-builds-trust-paracatu/">http://2013corporateresponsibilityreport.kinross.com/empowering-communities/case-study-community-monitoring-program-builds-trust-paracatu/</a>                                               |
| 87            | 103 | <a href="http://www.scielo.br/pdf/bn/v13n1/13.pdf">http://www.scielo.br/pdf/bn/v13n1/13.pdf</a>                                                                                                                                                                                                                                                   |
| 88            | 104 | <a href="https://ysdindia.org/Downloads/Report%20of%20the%20Social%20Audit%20of%20PSD%20in%20Berhampur,%20Odisha.pdf">https://ysdindia.org/Downloads/Report%20of%20the%20Social%20Audit%20of%20PSD%20in%20Berhampur,%20Odisha.pdf</a>                                                                                                             |
| 89            | 105 | <a href="https://www.dpme.gov.za/keyfocusareas/cbmSite/CBM%20Documents/FINAL%2016%20OCT%20Scoping%20community-based%20monitoring%20and%20accountability%20practices_v5.pdf">https://www.dpme.gov.za/keyfocusareas/cbmSite/CBM%20Documents/FINAL%2016%20OCT%20Scoping%20community-based%20monitoring%20and%20accountability%20practices_v5.pdf</a> |
| 90            | 106 | <a href="https://acwi.gov/monitoring/conference/2016/2_wednesday_may4/H6/Wood_H6_NWQMC2016_secure.pdf">https://acwi.gov/monitoring/conference/2016/2_wednesday_may4/H6/Wood_H6_NWQMC2016_secure.pdf</a>                                                                                                                                           |
| 91            | 107 | <a href="http://www.dwa.gov.za/iwqs/rhp/xtra/Volunteer_water_monitoring_manual.pdf">http://www.dwa.gov.za/iwqs/rhp/xtra/Volunteer_water_monitoring_manual.pdf</a>                                                                                                                                                                                 |

|                             |     |                                                                                                                                                                                                                                                                                                                                                                                                |
|-----------------------------|-----|------------------------------------------------------------------------------------------------------------------------------------------------------------------------------------------------------------------------------------------------------------------------------------------------------------------------------------------------------------------------------------------------|
| 92                          | 108 | <a href="https://ueaeprints.uea.ac.uk/61697/1/J_Stone_PhD_submitted_corrections_(1).pdf">https://ueaeprints.uea.ac.uk/61697/1/J_Stone_PhD_submitted_corrections_(1).pdf</a>                                                                                                                                                                                                                    |
| 93                          | 109 | <a href="http://www.medellin-urban-innovation.eca.ed.ac.uk/projects/upscaling-resilience/">http://www.medellin-urban-innovation.eca.ed.ac.uk/projects/upscaling-resilience/</a>                                                                                                                                                                                                                |
| 94, 95,<br>96, 97           | 110 | <a href="http://www.makingallvoicescount.org/">http://www.makingallvoicescount.org/</a>                                                                                                                                                                                                                                                                                                        |
| 98, 99,<br>100,<br>101      | 111 | <a href="http://unglobalpulse.org/sites/default/files/From%20Urban%20Data%20Collection%20to%20Urban%20Design.pdf">http://unglobalpulse.org/sites/default/files/From%20Urban%20Data%20Collection%20to%20Urban%20Design.pdf</a>                                                                                                                                                                  |
| 98                          | 112 | <a href="https://www.unglobalpulse.org/blog/data-action-when-communities-engage-mapping-urban-villages-together">https://www.unglobalpulse.org/blog/data-action-when-communities-engage-mapping-urban-villages-together</a>                                                                                                                                                                    |
| 102                         | 113 | <a href="https://www.jstor.org/stable/pdf/26270228.pdf?refreqid=excelsior%3A8c877aeb4cfdc907b67a38cd8c69e941">https://www.jstor.org/stable/pdf/26270228.pdf?refreqid=excelsior%3A8c877aeb4cfdc907b67a38cd8c69e941</a>                                                                                                                                                                          |
| 103,<br>104,<br>105,<br>106 | 114 | <a href="https://weburbanist.com/2014/03/05/crowdsourced-city-14-citizen-directed-urban-projects/3/">https://weburbanist.com/2014/03/05/crowdsourced-city-14-citizen-directed-urban-projects/3/</a>                                                                                                                                                                                            |
| 103                         | 115 | Deep Learning the City: Quantifying Urban Perception at a Global Scale<br>By: Dubey, Abhimanyu; Naik, Nikhil; Parikh, Devi; et al.<br>Conference: 14th European Conference on Computer Vision (ECCV) Location: Amsterdam, NETHERLANDS Date: OCT 08-16, 2016<br>COMPUTER VISION - ECCV 2016, PT I Book Series: Lecture Notes in Computer Science Volume: 9905 Pages: 196-212<br>Published: 2016 |
| 103                         | 116 | <a href="http://pulse.media.mit.edu/rankings/">http://pulse.media.mit.edu/rankings/</a>                                                                                                                                                                                                                                                                                                        |
| 107                         | 117 | <a href="https://www.bloomberg.com/news/articles/2015-04-28/how-amateur-mappers-are-helping-recovery-efforts-in-nepal">https://www.bloomberg.com/news/articles/2015-04-28/how-amateur-mappers-are-helping-recovery-efforts-in-nepal</a>                                                                                                                                                        |
| 108                         | 118 | <a href="http://adsabs.harvard.edu/abs/2017EGUGA..1912755D">http://adsabs.harvard.edu/abs/2017EGUGA..1912755D</a>                                                                                                                                                                                                                                                                              |
| 109                         | 119 | <a href="http://dispuutwatermanagement.com/index.php/2018/03/28/crowdsourcing-in-urban-context/">http://dispuutwatermanagement.com/index.php/2018/03/28/crowdsourcing-in-urban-context/</a>                                                                                                                                                                                                    |
| 110                         | 120 | <a href="http://habitat3.org/wp-content/uploads/Urban-Future-Report-Submitted-by-Lead-Organization-Crowdsourcing-and-Community-engagement-for-Sustainable-and-Safe-cities.pdf">http://habitat3.org/wp-content/uploads/Urban-Future-Report-Submitted-by-Lead-Organization-Crowdsourcing-and-Community-engagement-for-Sustainable-and-Safe-cities.pdf</a>                                        |
| 111                         | 121 | <a href="https://www.uhasselt.be/Documents/datasim/Summer%20School%202013/Presentation_Cong-Dinh.pdf">https://www.uhasselt.be/Documents/datasim/Summer%20School%202013/Presentation_Cong-Dinh.pdf</a>                                                                                                                                                                                          |
| 112                         | 122 | <a href="https://www.ubiquitypress.com/site/chapters/10.5334/bax.z/download/266/#:~:text=Mobile%20crowd%2Dsensing%20(MCS),sensing%20activity%20(Cardone%20et%20al.">https://www.ubiquitypress.com/site/chapters/10.5334/bax.z/download/266/#:~:text=Mobile%20crowd%2Dsensing%20(MCS),sensing%20activity%20(Cardone%20et%20al.</a>                                                              |
| 113                         | 123 | <a href="https://infoscience.epfl.ch/record/222870/files/EPFL_TH7243.pdf">https://infoscience.epfl.ch/record/222870/files/EPFL_TH7243.pdf</a>                                                                                                                                                                                                                                                  |
| 114                         | 124 | <a href="https://infolab.usc.edu/DocsDemos/Penny_GIS13.pdf">https://infolab.usc.edu/DocsDemos/Penny_GIS13.pdf</a>                                                                                                                                                                                                                                                                              |
| 115                         | 125 | <a href="https://www.springerprofessional.de/en/urban-noise-mapping-with-a-crowd-sensing-system/15419012">https://www.springerprofessional.de/en/urban-noise-mapping-with-a-crowd-sensing-system/15419012</a>                                                                                                                                                                                  |
| 116                         | 126 | <a href="https://www.springeropen.com/collections/bdmvgius">https://www.springeropen.com/collections/bdmvgius</a>                                                                                                                                                                                                                                                                              |

|                             |     |                                                                                                                                                                                                                                                                                                                       |
|-----------------------------|-----|-----------------------------------------------------------------------------------------------------------------------------------------------------------------------------------------------------------------------------------------------------------------------------------------------------------------------|
| 117,<br>118,<br>119,<br>120 | 127 | <a href="http://www.un-spider.org/sites/default/files/Volunteered%20Geographic%20Information.pdf">http://www.un-spider.org/sites/default/files/Volunteered%20Geographic%20Information.pdf</a>                                                                                                                         |
| 121                         | 128 | <a href="https://etd.ohiolink.edu/!etd.send_file?accession=osu1429609791&amp;disposition=inline">https://etd.ohiolink.edu/!etd.send_file?accession=osu1429609791&amp;disposition=inline</a>                                                                                                                           |
| 122                         | 129 | <a href="https://arxiv.org/pdf/1709.03406.pdf">https://arxiv.org/pdf/1709.03406.pdf</a>                                                                                                                                                                                                                               |
| 123                         | 130 | <a href="https://arxiv.org/pdf/1701.06429.pdf">https://arxiv.org/pdf/1701.06429.pdf</a>                                                                                                                                                                                                                               |
| 124                         | 131 | <a href="http://making-sense.eu/wp-content/uploads/2016/07/Making-Sense-D62-D41-Mapping-Participatory-Sensing.pdf">http://making-sense.eu/wp-content/uploads/2016/07/Making-Sense-D62-D41-Mapping-Participatory-Sensing.pdf</a>                                                                                       |
| 125                         | 132 | <a href="https://jyunnyu.csie.org/docs/pubs/cikm2016paper.pdf">https://jyunnyu.csie.org/docs/pubs/cikm2016paper.pdf</a>                                                                                                                                                                                               |
| 126                         | 133 | <a href="https://bengaluru.citizenmatters.in/tracking-what-bengaluru-is-breathing-in-8792">https://bengaluru.citizenmatters.in/tracking-what-bengaluru-is-breathing-in-8792</a>                                                                                                                                       |
| 127                         | 134 | <a href="http://www.unesco.org/new/en/social-and-human-sciences/themes/most-programme/sv10/news/inclusion_as_a_process_participatory_data_collection_for_di/">http://www.unesco.org/new/en/social-and-human-sciences/themes/most-programme/sv10/news/inclusion_as_a_process_participatory_data_collection_for_di/</a> |
| 128                         | 135 | <a href="https://www.participatorymodeling.org/node/121">https://www.participatorymodeling.org/node/121</a>                                                                                                                                                                                                           |
| 129                         | 136 | <a href="http://sasdialliance.org.za/know-your-city-why-community-collected-data-on-informal-settlements-is-needed/">http://sasdialliance.org.za/know-your-city-why-community-collected-data-on-informal-settlements-is-needed/</a>                                                                                   |
| 130,<br>131,<br>132         | 137 | <a href="https://archivesic.ccsd.cnrs.fr/OPENAIRE/hal-00591855v1">https://archivesic.ccsd.cnrs.fr/OPENAIRE/hal-00591855v1</a>                                                                                                                                                                                         |
| 131                         | 138 | <a href="http://www.transparentchennai.com/transparent-chennai-at-the-india-urban-conference-can-data-creation-be-a-form-of-meaningful-participation/">http://www.transparentchennai.com/transparent-chennai-at-the-india-urban-conference-can-data-creation-be-a-form-of-meaningful-participation/</a>               |
| 133                         | 139 | <a href="http://bengaluru.urbanwaters.in/wp-content/uploads/sites/3/2017/08/Participatory-Aquifer-Mapping_final-report-version-2.pdf">http://bengaluru.urbanwaters.in/wp-content/uploads/sites/3/2017/08/Participatory-Aquifer-Mapping_final-report-version-2.pdf</a>                                                 |
| 134                         | 140 | <a href="http://www.globalproblems-globalsolutions-files.org/unf_website/PDF/vodafone/tech_social_change/Environmental_Conservation_case3.pdf">http://www.globalproblems-globalsolutions-files.org/unf_website/PDF/vodafone/tech_social_change/Environmental_Conservation_case3.pdf</a>                               |
| 135                         | 141 | <a href="http://mirror.unhabitat.org/downloads/docs/8691_67668_SandrineCapelle.pps">http://mirror.unhabitat.org/downloads/docs/8691_67668_SandrineCapelle.pps</a>                                                                                                                                                     |
| 136,<br>137                 | 142 | <a href="https://cfsc.niua.org/sites/default/files/Urban%20Conclave%2008122017%20QCM-DRR%20presentation%2C%20CDSA.pdf">https://cfsc.niua.org/sites/default/files/Urban%20Conclave%2008122017%20QCM-DRR%20presentation%2C%20CDSA.pdf</a>                                                                               |
| 138,<br>139                 | 143 | <a href="https://www.thenatureofcities.com/2018/07/24/urban-metabolism-real-world-model-visualizing-co-creating-healthy-cities/">https://www.thenatureofcities.com/2018/07/24/urban-metabolism-real-world-model-visualizing-co-creating-healthy-cities/</a>                                                           |
